# Supplementary material
Source: PubMed Central journal article supplement (PMC3158171)
Supplement: 1103373108_pnas.201103373SI.pdf [file 1103373108_pnas.201103373SI.pdf]

# Supporting Information

Bellon et al. 10.1073/pnas.1103373108

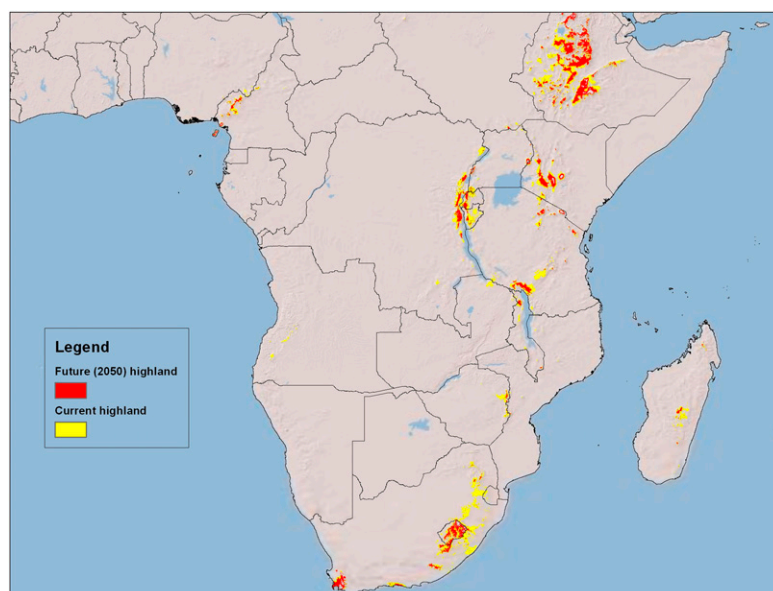

**Fig. S1.** Current (yellow) and future [2050 Hadley Centre Coupled Model Version 3 (HadCM3) scenario] (red) highland maize agro-climate environments in sub-Saharan Africa. Under this scenario, highland maize agro-climate environments are estimated to decline in area by ~47%.

**Table S1.** Farming characteristics in the communities studied by maize agro-climate environments

|                                                 | Maize agro-climate environment |      |      |      |                      |
|-------------------------------------------------|--------------------------------|------|------|------|----------------------|
|                                                 | WL                             | DL   | WUMA | H    | Total                |
| <b>Household characteristics</b>                |                                |      |      |      |                      |
| Indigenous households (%)                       | 64.3                           | 15.0 | 50.0 | 3.3  | 30.5 <sup>*,§</sup>  |
| Mean number of crops                            | 2.8                            | 2.3  | 2.8  | 3.9  | 3.2 <sup>†,§</sup>   |
| Mean number of fruit-tree species               | 1.3                            | 1.8  | 1.7  | 0.6  | 1.1 <sup>†,§</sup>   |
| Mean number of domestic animal species kept     | 1.9                            | 1.1  | 2.2  | 2.8  | 2.3 <sup>†,§</sup>   |
| Households who perform off-farm labor (%)       | 56.4                           | 47.5 | 72.5 | 41.1 | 50.3 <sup>*,§</sup>  |
| Mean number of nonfarm activities per household | 2.5                            | 2.6  | 2.7  | 2.4  | 2.5                  |
| Farmers who produce for self-consumption (%)    | 99.3                           | 99.3 | 95   | 97.2 | 97.7                 |
| Farmers who sell maize (%)                      | 60                             | 42.5 | 50   | 42.2 | 49.3 <sup>*,†</sup>  |
| Household with migrants within the country (%)  | 22.86                          | 22.5 | 25   | 17.8 | 20.8                 |
| Household with migrants outside the country (%) | 5.7                            | 17.5 | 10   | 17.8 | 12.75 <sup>*,§</sup> |
| <b>Maize planted</b>                            |                                |      |      |      |                      |
| Spring–summer (mean area per household, ha)     | 1.8                            | 1.9  | 1.3  | 3.0  | 2.3 <sup>†,§</sup>   |
| Autumn–winter (mean area per household, ha)     | 1.8                            | 1.9  | 1.1  | 0.0  | 1.7                  |
| <b>Type of maize producers (%)</b>              |                                |      |      |      |                      |
| Deficit                                         | 27.1                           | 32.5 | 52.5 | 36.1 | 34.3                 |
| Equilibrium                                     | 12.9                           | 7.5  | 12.5 | 11.7 | 11.7                 |
| Surplus                                         | 60                             | 60   | 35   | 52.2 | 54.0                 |
| <b>Number of uses of maize</b>                  |                                |      |      |      |                      |
|                                                 | 3.3                            | 3.2  | 2.7  | 3.2  | 3.2                  |

DL, dry lowland; H, highland; WL, wet lowland; WUMA, wet upper midaltitude.

\*Statistical significance associated with a likelihood-ratio  $\chi^2$  test.

<sup>†</sup>Statistical significance associated with a one-way ANOVA.

<sup>‡</sup> $P < 0.05$ .

<sup>§</sup> $P < 0.01$ .

**Table S2. Current and predicted maize agro-climate environments and access to future environments within the current 10-km radial zones by community**

| Community | Current maize environment | Predicted maize environment |              | Current distribution of pixels (% , 10-km radial zones by maize agro-climate environment) |      |      |      |      |      |            | Maize environment already present within 10-km zone |            |
|-----------|---------------------------|-----------------------------|--------------|-------------------------------------------------------------------------------------------|------|------|------|------|------|------------|-----------------------------------------------------|------------|
|           |                           | Median                      | HadCM3-A2a   | DL                                                                                        | WL   | WLMA | WUMA | DMA  | H    | Suboptimal | Median                                              | HadCM3-A2a |
| 1         | WL                        | WL                          | WL           | 0                                                                                         | 100  | 0    | 0    | 0    | 0    | 0          | Yes                                                 | Yes        |
| 2         | WL                        | WL                          | WL           | 0                                                                                         | 69.6 | 27.3 | 3.1  | 0    | 0    | 0          | Yes                                                 | Yes        |
| 3         | WL                        | WL                          | WL           | 0                                                                                         | 100  | 0    | 0    | 0    | 0    | 0          | Yes                                                 | Yes        |
| 4         | WL                        | WL                          | WL           | 0                                                                                         | 75.7 | 18.7 | 5.6  | 0    | 0    | 0          | Yes                                                 | Yes        |
| 5         | WL                        | WL                          | WL           | 0                                                                                         | 98.5 | 1.5  | 0    | 0    | 0    | 0          | Yes                                                 | Yes        |
| 6         | WL                        | DL                          | DL           | 37.9                                                                                      | 61.6 | 0.5  | 0    | 0    | 0    | 0          | Yes                                                 | Yes        |
| 7         | WL                        | DL                          | DL           | 36.6                                                                                      | 63.4 | 0    | 0    | 0    | 0    | 0          | Yes                                                 | Yes        |
| 8         | DL                        | DL                          | DL           | 73.9                                                                                      | 26.1 | 0    | 0    | 0    | 0    | 0          | Yes                                                 | Yes        |
| 9         | DL                        | DL                          | DL           | 99.2                                                                                      | 0.8  | 0    | 0    | 0    | 0    | 0          | Yes                                                 | Yes        |
| 10        | WUMA                      | WLMA                        | WL           | 0                                                                                         | 5.9  | 26   | 55.2 | 0    | 13   | 0          | Yes                                                 | Yes        |
| 11        | WUMA                      | WLMA                        | WL           | 0                                                                                         | 80.3 | 12.4 | 7.3  | 0    | 0    | 0          | Yes                                                 | Yes        |
| 12        | H                         | DMA                         | DMA          | 0                                                                                         | 0    | 0    | 0    | 0    | 100  | 0          | No                                                  | No         |
| 13        | H                         | H                           | DMA          | 0                                                                                         | 0    | 0    | 0    | 0    | 94.2 | 5.8        | Yes                                                 | No         |
| 14        | H                         | H                           | H            | 0                                                                                         | 0    | 0    | 0    | 0    | 90.1 | 9.9        | Yes                                                 | Yes        |
| 15        | H                         | Too dry/cool                | Too dry/cool | 0                                                                                         | 0    | 0    | 0    | 15.2 | 3.5  | 81.3       | Yes                                                 | Yes        |
| 16        | H                         | H                           | H            | 0                                                                                         | 0    | 0    | 0    | 0    | 82.2 | 17.8       | Yes                                                 | Yes        |
| 17        | H                         | Too dry/cool                | Too dry/cool | 0                                                                                         | 0    | 0    | 0    | 3.1  | 64   | 32.9       | Yes                                                 | Yes        |
| 18        | H                         | H                           | H            | 0                                                                                         | 0    | 0    | 0    | 0    | 89.4 | 10.6       | Yes                                                 | Yes        |
| 19        | H                         | H                           | H            | 0                                                                                         | 0    | 0    | 0    | 0    | 38.6 | 61.4       | Yes                                                 | Yes        |
| 20        | H                         | WUMA                        | WL           | 0                                                                                         | 0    | 0    | 28.5 | 0    | 71.5 | 0          | Yes                                                 | No         |

DL, dry lowland; H, highland; WL, wet lowland; WLMA, wet lower midaltitude, WUMA, wet upper midaltitude.

**Table S3. Results of marginal homogeneity tests on the change of pixels by maize environment between current conditions and the two future scenarios (median and HadCM3-A2a)**

| Current          | WL    | DL    | WLMA | WUMA | DMA   | H     | Too dry | Too cold | Total |
|------------------|-------|-------|------|------|-------|-------|---------|----------|-------|
| Median 2050*     |       |       |      |      |       |       |         |          |       |
| WL               | 2,110 | 492   | 0    | 0    | 0     | 0     | 0       | 0        | 2,602 |
| DL               | 0     | 925   | 0    | 0    | 0     | 0     | 0       | 0        | 925   |
| WLMA             | 323   | 0     | 16   | 0    | 0     | 0     | 0       | 0        | 339   |
| WUMA             | 10    | 0     | 191  | 191  | 0     | 0     | 0       | 0        | 392   |
| DMA              | 0     | 0     | 0    | 0    | 49    | 0     | 23      | 0        | 72    |
| H                | 0     | 0     | 0    | 174  | 608   | 1,595 | 157     | 0        | 2,534 |
| Too dry          | 0     | 0     | 0    | 0    | 0     | 0     | 440     | 0        | 440   |
| Too cold         | 0     | 0     | 0    | 0    | 0     | 318   | 0       | 103      | 421   |
| Total            | 2,443 | 1417  | 207  | 365  | 657   | 1,913 | 620     | 103      | 7,725 |
| HadCM3-A2a 2050† |       |       |      |      |       |       |         |          |       |
| WL               | 2,088 | 514   | 0    | 0    | 0     | 0     | 0       | 0        | 2,602 |
| DL               | 0     | 925   | 0    | 0    | 0     | 0     | 0       | 0        | 925   |
| WLMA             | 339   | 0     | 0    | 0    | 0     | 0     | 0       | 0        | 339   |
| WUMA             | 156   | 0     | 194  | 42   | 0     | 0     | 0       | 0        | 392   |
| DMA              | 0     | 0     | 0    | 0    | 40    | 0     | 32      | 0        | 72    |
| H                | 0     | 0     | 2    | 297  | 1,066 | 923   | 246     | 0        | 2,534 |
| Too dry          | 0     | 0     | 0    | 0    | 0     | 0     | 440     | 0        | 440   |
| Too cold         | 0     | 0     | 0    | 0    | 0     | 379   | 0       | 42       | 421   |
| Total            | 2,583 | 1,439 | 196  | 339  | 1,106 | 1,302 | 718     | 42       | 7,725 |

The numbers in the table are frequencies of pixels. WL, wet lowland; DL, dry lowland; WLMA, wet lower midaltitude; WUMA, wet upper midaltitude; H, highland.

|                                        | $\chi^2$ | df | Prob> $\chi^2$ |
|----------------------------------------|----------|----|----------------|
| *Symmetry (asymptotic)                 | 2,296.00 | 9  | 0.0000         |
| *Marginal homogeneity (Stuart-Maxwell) | 2,267.35 | 7  | 0.0000         |
| *Marginal homogeneity (Bickenboller)   | 920.96   | 7  | 0.0000         |
| *Marginal homogeneity (no diagonals)   | 1,667.43 | 7  | 0.0000         |
| †Symmetry (asymptotic)                 | 3,225.00 | 10 | 0.0000         |
| †Marginal homogeneity (Stuart-Maxwell) | 3,127.70 | 7  | 0.0000         |
| †Marginal homogeneity (Bickenboller)   | 1,834.15 | 7  | 0.0000         |
| †Marginal homogeneity (no diagonals)   | 2,581.58 | 7  | 0.0000         |

**Table S4. Maize production estimates by maize agro-climatic environments in Mexico**

| Mega-environment       | Estimated maize production in 2000 (t) | Proportion (%) |
|------------------------|----------------------------------------|----------------|
| Dry lowland            | 2,254,217                              | 15             |
| Wet lowland            | 4,517,348                              | 30             |
| Dry mid-altitude       | 1,719,565                              | 11             |
| Wet lower mid-altitude | 1,308,194                              | 9              |
| Wet upper mid-altitude | 2,624,454                              | 17             |
| Highland               | 2,737,862                              | 18             |

Estimates derived using Spatial Production Allocation Model (SPAM) 2000 (1), version 3, data on maize production estimates.

1. You L, et al. (2010) Spatial Production Allocation Model (SPAM), 2000 Version 3 Release 2. Available at <http://MapSPAM.info>. Accessed 21 December 2010).
